# Supplementary material
Source: publisher figshare collection journal article supplement (https://gsapubs.figshare.com/ndownloader/files/23318894)
Supplement: Supplementary file 1 [file 23318894]

## Sheet: Sheet1
Table DR1. Youngest detrital-zircon U–Pb ages of sandstone samples from the Shexing Formation.
Samples	Stratigraphic Unit	YSG	YPP	YC1σ(2+)	YC2σ(3+)
17LZ-A	Uppermost Shexing	111 ± 2	113	113 ± 2 (n=2)	152 ± 3 (n=3)
13MQ20	Uppermost Shexing	98 ± 1	132	132 ± 3 (n=2)	198 ± 3 (n=3)
13MQ15	Upper Shexing	94 ± 2	98	96 ± 1 (n=18)	99 ±1 (n=40)
PENBO2	Upper Shexing	100 ± 2	106	102 ± 3 (n=4)	105 ± 2 (n=10)
13LZ55	Upper Shexing	104 ± 3	107	107 ±2 (n=14)	108 ±1 (n=16)
13LZ49	Upper Shexing	105 ± 2	107	107 ± 2 (n=5)	108 ± 2 (n=6)
14MQ-A	Upper Shexing	106 ± 2	109	108 ± 2 (n=7)	110 ± 1 (n=12)
13LZ29	Upper Shexing	106 ± 3	113	109 ± 3 (n=4)	112 ± 2 (n=7)
13LZ38	Middle Shexing	106 ± 3	113	109 ± 4 (n=3)	111 ± 3 (n=4)
PENBO1	Lower Shexing	110 ± 2	120	112 ± 3 (n=5)	114 ± 3 (n=11)
14LZ01	Lower Shexing	114 ± 2	116	116 ± 2 (n=8)	116 ± 2 (n=8)
13LZ06	Lower Shexing	116 ± 3	122	119 ± 2 (n=11)	122 ± 1 (n=22)
YSG, the youngest single detrital zircon grain age; YPP, the youngest graphical detrital zircon age peak; YC1σ(2+), the mean age of the youngest cluster (n≥2) of grain ages that overlap in age at 1σ error; YC2σ(3+), the mean age YC2σ(3+) of the youngest cluster (n≥3) of grain ages that overlap in age at 2σ.
